# Supplementary material for: Evaluating the utility of inflammatory markers in the diagnosis of soft tissue abscesses of the forearm and hand
Source: Copernicus journal article supplement (doi:10.5194/jbji-8-119-2023), 2023-03-30
Supplement: Supplementary file [file jbji-8-119-2023-supplement.pdf]

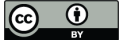

*Supplement of*

## **Evaluating the utility of inflammatory markers in the diagnosis of soft tissue abscesses of the forearm and hand**

**Sarah R. Blumenthal et al.**

*Correspondence to:* Sarah R. Blumenthal ([sarahrblumenthal@gmail.com](mailto:sarahrblumenthal@gmail.com))

The copyright of individual parts of the supplement might differ from the article licence.

Supplement: Current Procedural Terminology (CPT) codes used to identify patients for study inclusion, followed by manual review

10060 - Incision and drainage of abscess eg, carbuncle, suppurative hidradenitis, and other cutaneous or subcutaneous abscess, cyst, furuncle , or paronychia; simple or single

10061 - Incision and drainage of abscess eg, carbuncle, suppurative hidradenitis, and other cutaneous or subcutaneous abscess, cyst, furuncle, or paronychia); complicated or multiple

10140 - Incision and drainage of hematoma, seroma or fluid collection

10180 - Incision and drainage, complex, postoperative wound infection

20000 - Incision of soft tissue abscess eg, secondary to osteomyelitis) ; superficial

20005 - Incision of soft tissue abscess eg, secondary to osteomyelitis) ; deep or complicated

23930 - Incision deep, with opening of bone cortex; elbow or upper arm

23931 - Incision and drainage elbow bursa

25028 - Incision and drainage, forearm and/or wrist; deep abscess or hematoma

25031 - Incision and drainage, forearm and/or wrist; infected bursa

25035 - Incision, deep, with opening of bone cortex eg, for osteomyelitis or bone abscess), forearm and/or wrist

25040 - Arthrotomy, radiocarpal or mediocarpal joint, with exploration, drainage, or removal of foreign body

26010 - Drainage of finger abscess; simple

26011 - Drainage of finger abscess; complicated eg, felon, etc)

26020 - Drainage of tendon sheath, one digit and/or palm

26025 - Drainage of palmar bursa; single, ulnar or radial

26030 - Drainage of palmar bursa; multiple or complicated

26034 - Incision, deep, with opening of bone cortex eg, for osteomyelitis or bone abscess), hand or finger

26070 - Arthrotomy, for infection, with exploration, drainage or removal of foreign body; carpometacarpal joint

26075 - Arthrotomy, for infection, with exploration, drainage or removal of foreign body; metacarpophalangeal joint

26080 - Arthrotomy, for infection, with exploration, drainage or removal of foreign body; interphalangeal joint, each
